# Supplementary material for: Clinicopathological and Molecular Analysis of Aqueous Humor for the Diagnosis of Feline Infectious Peritonitis
Source: MDPI journal article supplement (doi:10.3390/vetsci11050207), 2024-05-09

### Supplementary figure

Exemplificative images of positive results in FIP cats. A) multifocal pyogranulomatous lesions in the omentum (Hematoxylin and eosin stain, 40X magnification); B) scattered FCoV-positive cells within the pyogranulomatous lesions (anti-FCoV immunohistochemistry, Immunoperoxidase staining). Histological and immunohistochemical details are reported at higher magnification (100X) in the inserts at the left bottom corner of each image.

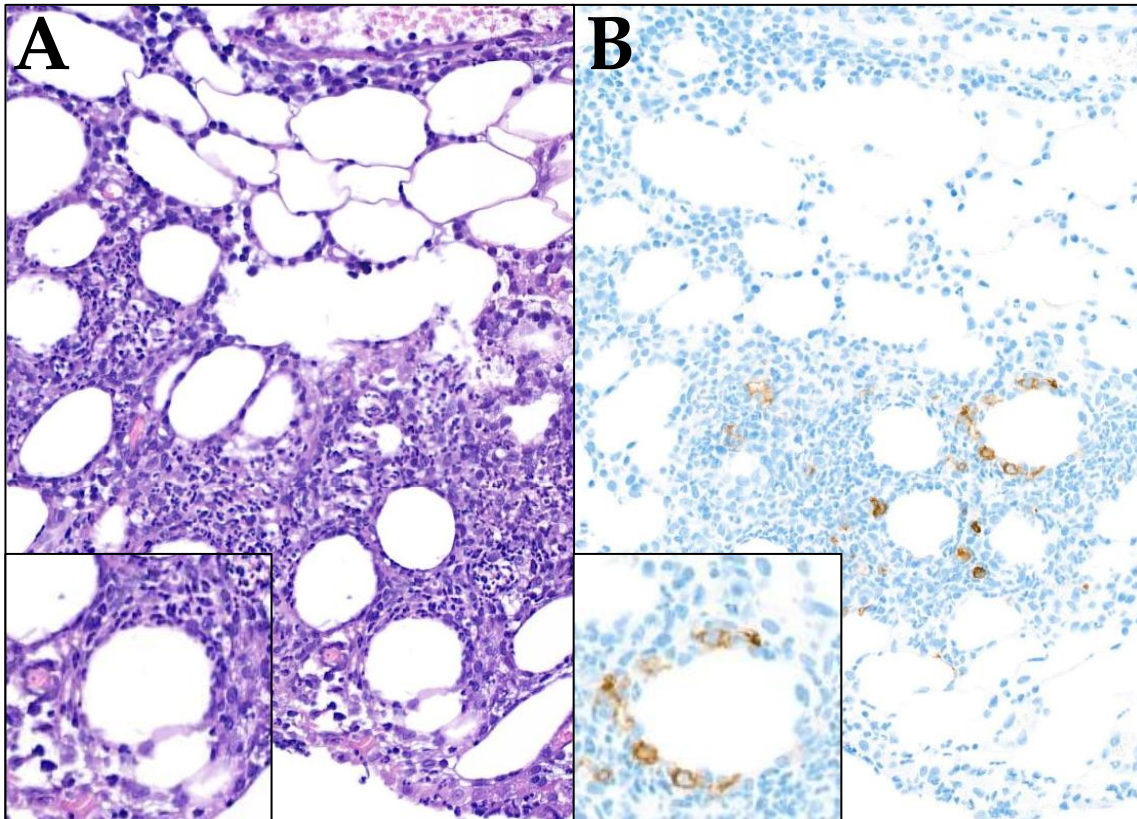

Supplement: s1 [file s1]
